# Supplementary material for: Reconstruction and Removal Mechanisms of Gel-like Membrane Fouling for Seawater Desalination: Experiments and Molecular Dynamics Simulations
Source: MDPI journal article supplement (doi:10.3390/polym14183734), 2022-09-07
Supplement: s1 [file s1]

Article

# Reconstruction and Removal Mechanisms of Gel-like Membrane Fouling for Seawater Desalination: Experiments and Molecular Dynamics Simulations

Qi Wang <sup>1,2</sup>, Xiang-Yu Yang <sup>2</sup>, Rong-Hui Qi <sup>2,\*</sup> and Li-Zhi Zhang <sup>2</sup>

<sup>1</sup> School of Electric Power Engineering, South China University of Technology, Guangzhou 510640, China

<sup>2</sup> Key Laboratory of Enhanced Heat Transfer and Energy Conservation of Education Ministry, School of Chemistry and Chemical Engineering, South China University of Technology, Guangzhou 510640, China

\* Correspondence: qirh@scut.edu.cn; Tel.: +86-020-87112053

**Supplementary Materials:** The following supporting information can be downloaded at: <https://www.mdpi.com/article/10.3390/polym14183734/s1>.

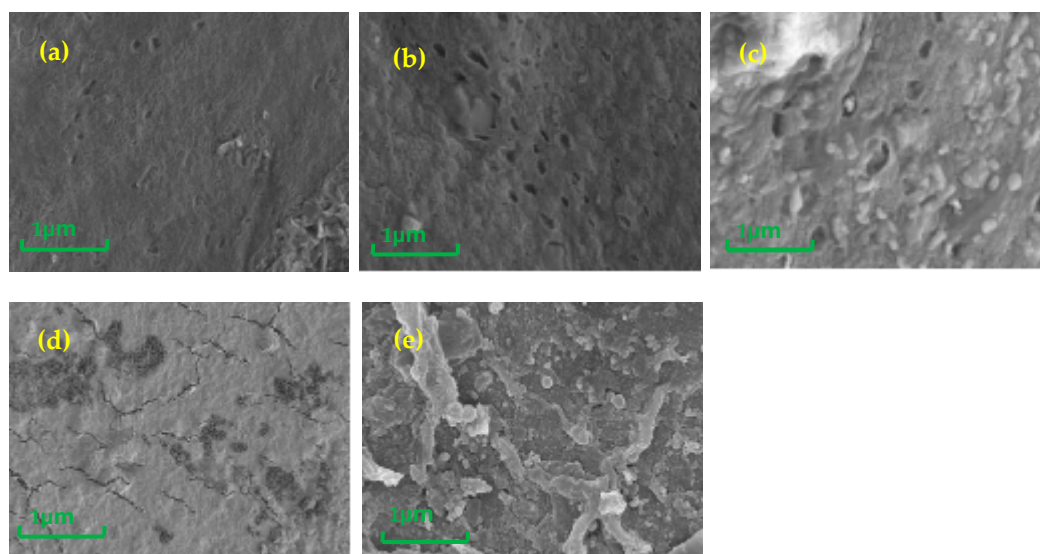

**Figure S1.** The pore size of gel layer.

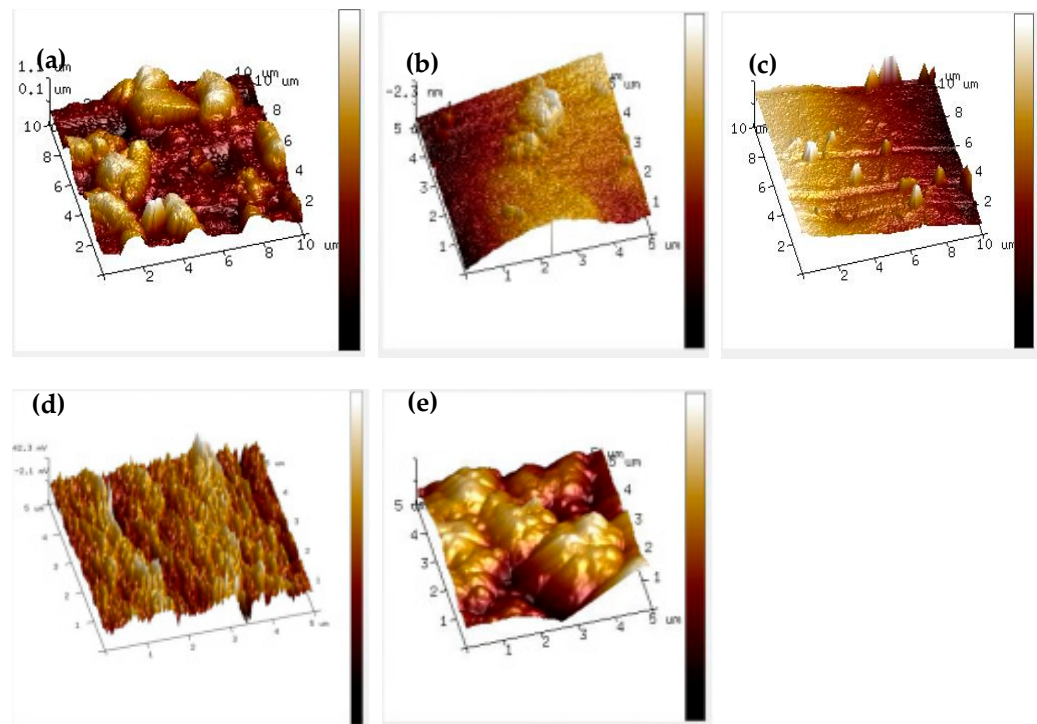

**Figure S2.** The AFM images of the pollutant gel layer: (a) The concentration of organic acid was 2%; (b) The concentration of organic acid was 2.5%; (c) The concentration of organic acid was 3%. (d) The concentration of organic acid was 3.5%; (e) The concentration of organic acid was 4%.

**Table S1.** The elastic stiffness matrix (GPa) of the gel.

|         |         |         |         |         |         |
|---------|---------|---------|---------|---------|---------|
| 24.2133 | 8.8583  | 9.9454  | -0.3980 | 0.3127  | 0.2524  |
| 8.8583  | 25.7148 | 9.3042  | 0.0528  | 0.0662  | 0.6521  |
| 9.9454  | 9.3042  | 23.4086 | -0.7025 | -0.5777 | 0.2322  |
| -0.3980 | 0.0528  | -0.7025 | 5.8946  | -0.0417 | -0.0586 |
| 0.3127  | 0.0662  | -0.5777 | -0.0417 | 6.9433  | 0.0375  |
| 0.2524  | 0.6521  | 0.2322  | -0.0586 | 0.0375  | 7.3565  |
